# Supplementary material for: Mechanochemical preparation of graphdiyne (CnH2n−2) based Ni-doped MoS2S-scheme heterojunctions within situXPS characterization for efficient hydrogen production
Source: Royal Society of Chemistry journal article supplement (doi:10.1039/d3tc01246h), 2023-01-01
Supplement: d3tc01246h1.pdf [file d3tc01246h1.pdf]

**Mechanochemically preparation of graphdiyne ( $C_nH_{2n-2}$ ) based Ni-doped  $MoS_2$   
S-scheme heterojunctions with in situ XPS characterization for efficient  
hydrogen production**

Zhenkun Liu<sup>1</sup>, Youji Li<sup>2</sup>, Zhiliang Jin<sup>1\*</sup>

*1. School of Chemistry and Chemical Engineering, Ningxia Key Laboratory of Solar Chemical  
Conversion Technology, Key Laboratory for Chemical Engineering and Technology, State Ethnic  
Affairs Commission, North Minzu University, Yinchuan 750021, P.R.China*

*2. College of Chemistry and Chemical Engineering, Jishou University, Jishou, Hunan  
416000, PR China*

Corresponding author: zl-jin@nun.edu.cn (Z.L. Jin)

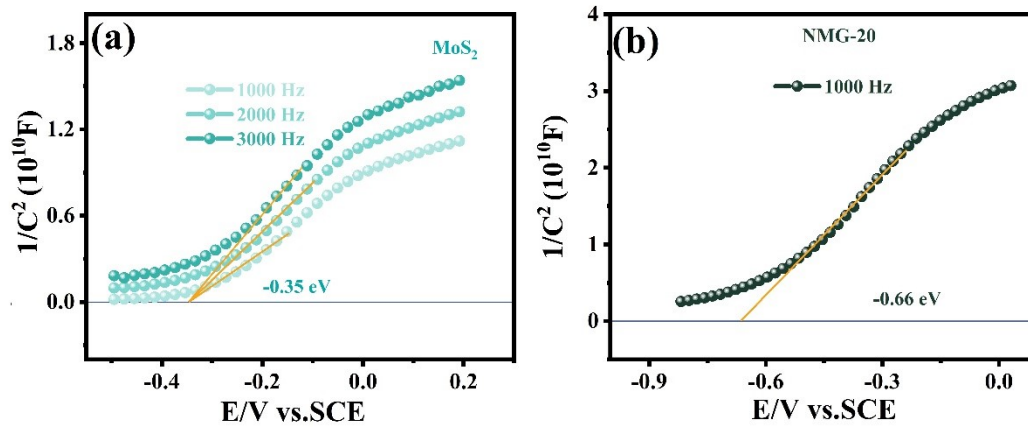

Fig. S1 M-S curves of (a)  $\text{MoS}_2$  and (b) NMG-20.

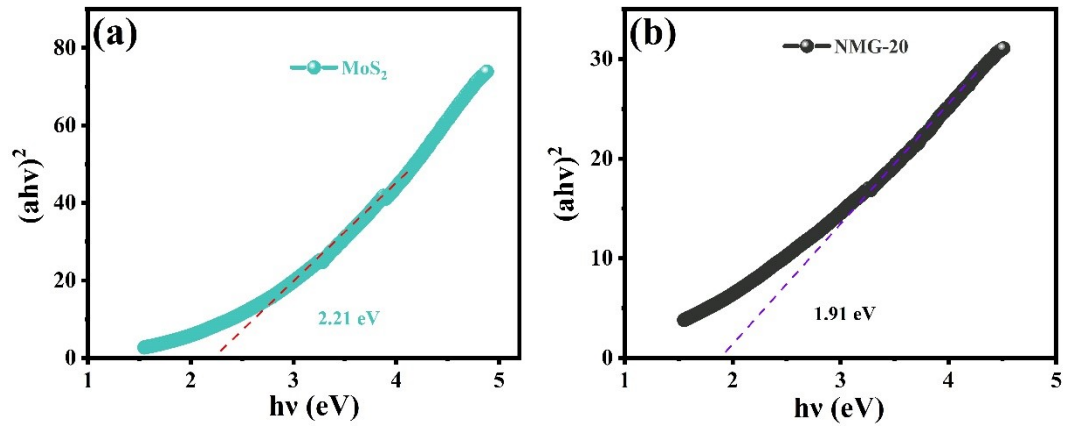

Fig. S2 The band gap of (a) MoS<sub>2</sub> and (b) NMG-20.

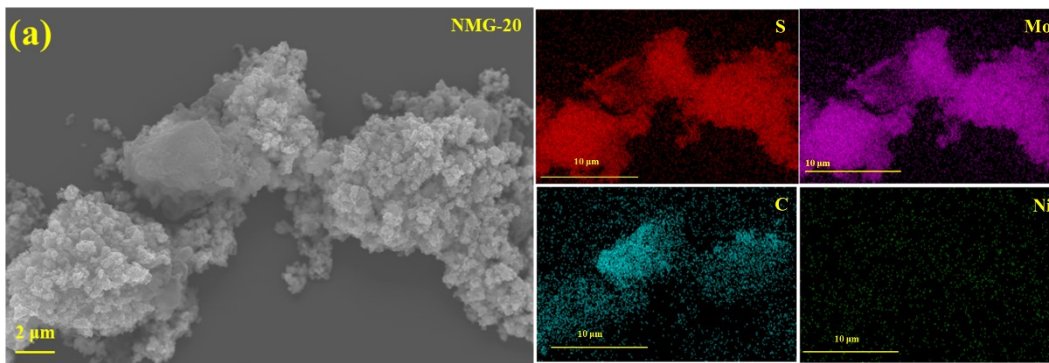

Fig. S3 SEM mapping of NMG-20.

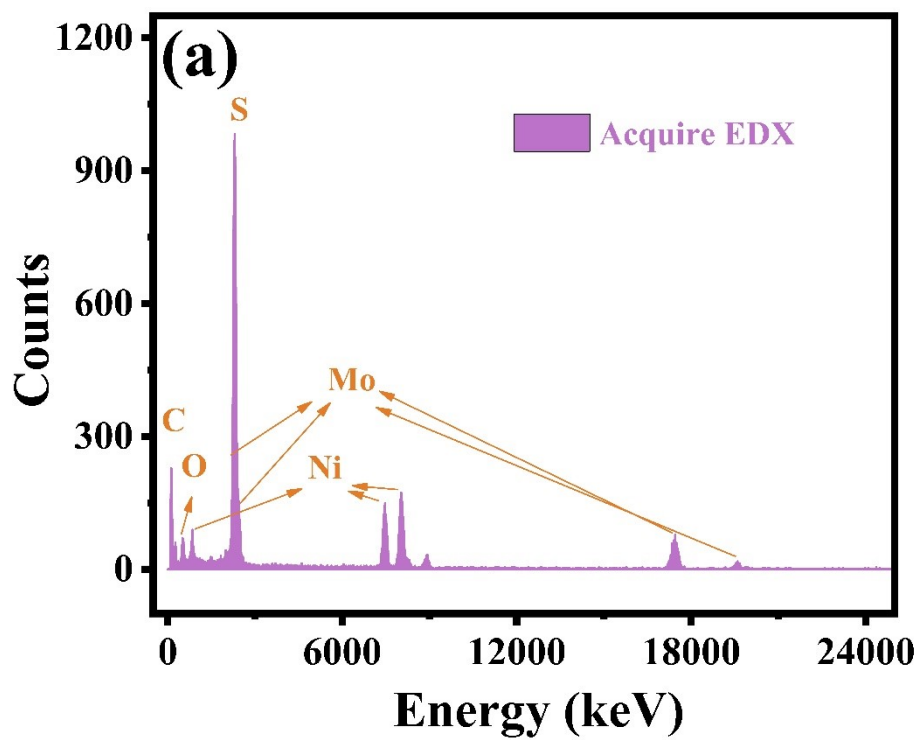

Fig. S4 EDX of NMG-20.

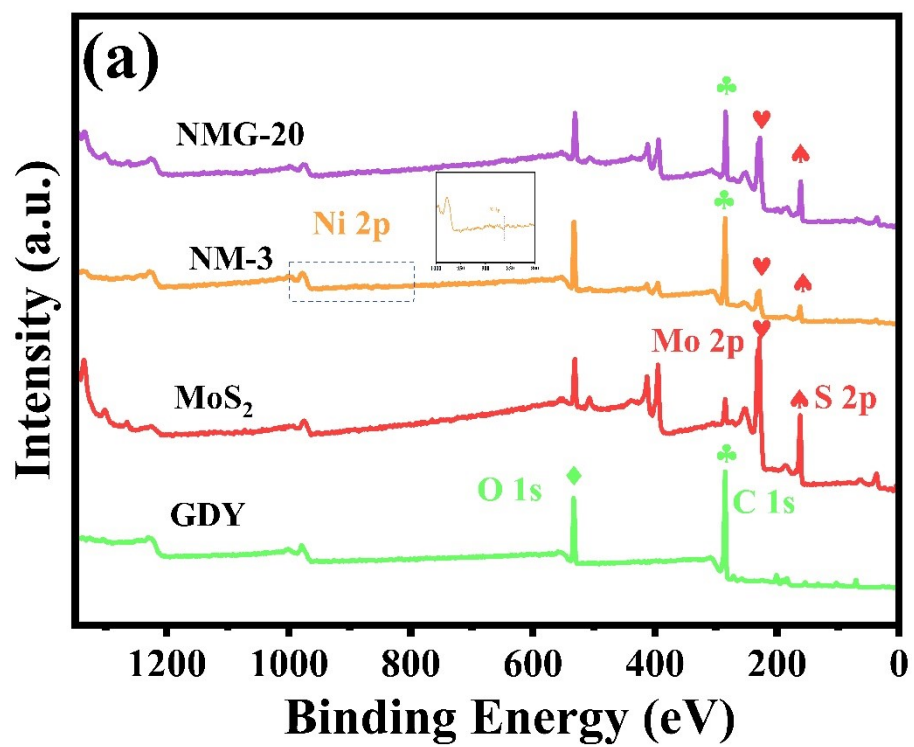

Fig. S5 Survey spectrum of GDY, MoS<sub>2</sub>, NM-3, NMG-20.

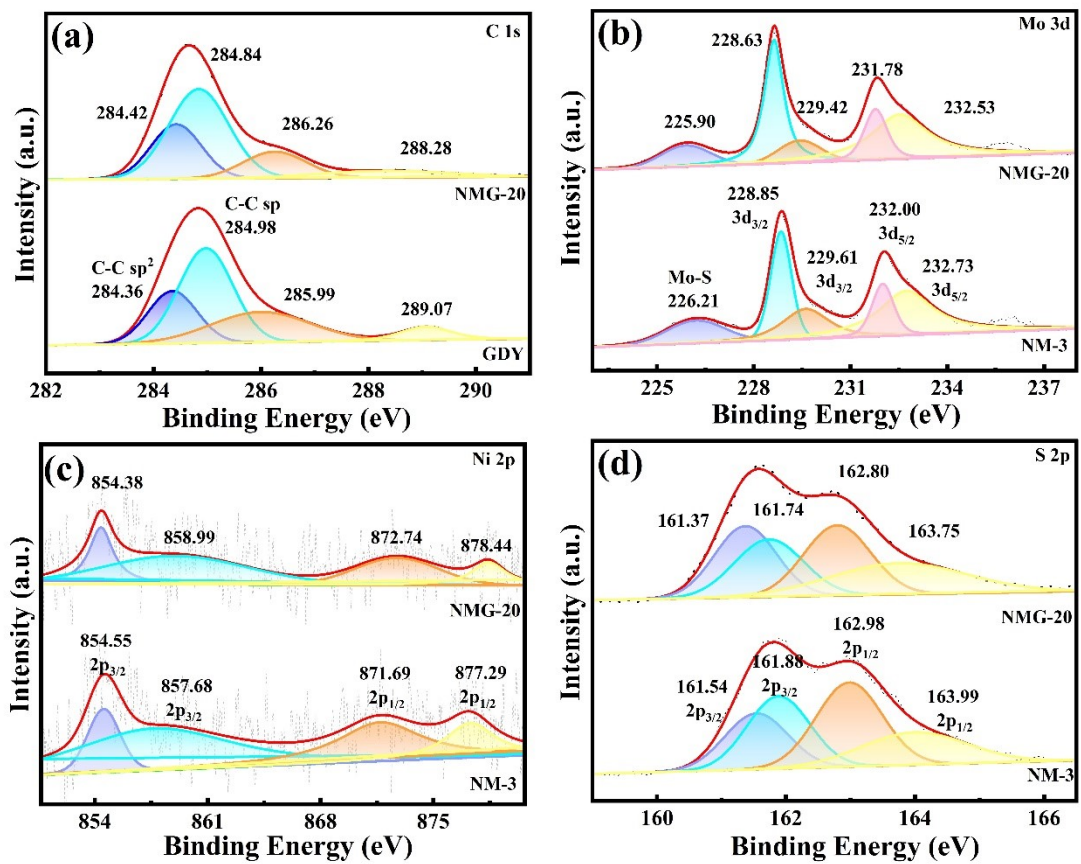

Fig. S6 XPS spectroscopy of (a) C 1s; (b) Mo 3d; (c) Ni 2p (d) and S 2p in NMG-20
